# Supplementary material for: Light-activated antimicrobial surfaces with enhanced efficacy induced by a dark-activated mechanism
Source: Royal Society of Chemistry journal article supplement (doi:10.1039/c3sc53186d), 2014-01-01
Supplement: c3sc53186d1.pdf [file c3sc53186d1.pdf]

## Supplementary Information

The infrared absorbance spectra of the silicone samples prepared for the microbiological testing, in addition to an untreated silicone sample, obtained by ATR.

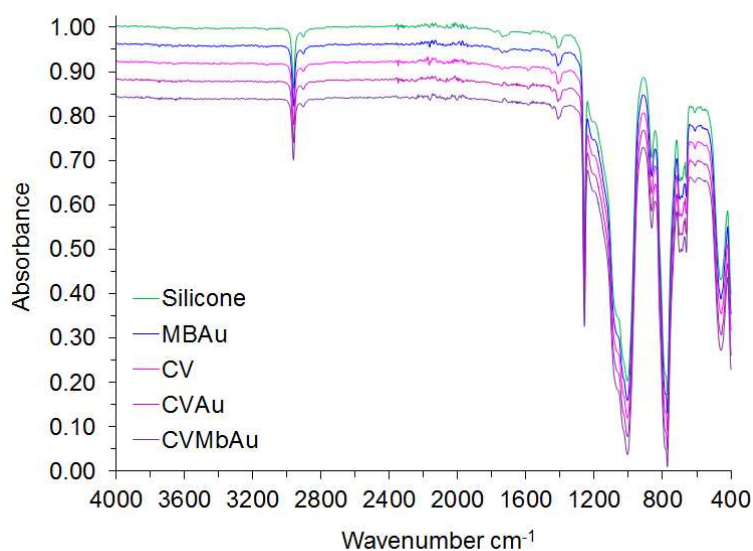

**Figure 1:** Supplementary Information: IR absorbance spectra of modified and untreated silicone samples measured within the range 4000 - 400 cm<sup>-1</sup>
